# Supplementary material for: A multifaceted approach for analyzing complex phenotypic data in rodent models of autism
Source: Mol Autism. 2019 Mar 12;10:11. doi: 10.1186/s13229-019-0263-7 (PMC6417187; doi:10.1186/s13229-019-0263-7)
Supplement: Supplementary file 4 — Table S9. Shank3 model construct definitions (all KO and KI) (excel sheet). (XLSX 14 kb) [file 13229_2019_263_MOESM4_ESM.xlsx]

## Sheet: Sheet1
Model ID	Model Type	Model Genotype	Construct Def	Agent	Parent Model
SHANK3_1_KO_HM	Genetic	Homozygous	Targeted Cre/loxP mediated deletion of exon 4 to exon 9 of Shank3 gene
SHANK3_1_KO_HT	Genetic	Heterozygous	Targeted Cre/loxP mediated deletion of exon 4 to exon 9 of Shank3 gene
SHANK3_1_KO_HT_IGF1-H	RESCUE-Pharmaceutical	Homozygous	Targeted Cre/loxP mediated deletion of exon 4 to exon 9 of Shank3 gene followed by intraperitoneal injection at 240 microg/kg/day starting at PND 13-15 for 2 weeks of full-length IGF-1	IGF-1	SHANK3_1_KO_HT
SHANK3_1_KO_HT_IGF1-L	RESCUE-Pharmaceutical	Homozygous	Targeted Cre/loxP mediated deletion of exon 4 to exon 9 of Shank3 gene followed by intraperitoneal injection at 120 microg/kg/day starting at PND 13-15 for 2 weeks of full-length IGF-1	IGF-1	SHANK3_1_KO_HT
SHANK3_1_KO_HT_pIGF1	RESCUE-Pharmaceutical	Homozygous	Targeted Cre/loxP mediated deletion of exon 4 to exon 9 of Shank3 gene followed by intraperitoneal injections at 10 microg/g/day for 2 weeks of active peptide derivative of IGF-1	peptide derivative of IGF-1	SHANK3_1_KO_HT
SHANK3_10_KI_HM_InsG	Genetic	Homozygous	Autism-associated guanine nucleotide insertion mutation (Shank3G) present in exon 21 was inserted into the Shank 3 gene, with the construct containing the mutation within exon21 sequence knocked into intron 20 .The additional G results in a frameshift mutation and a premature stop codon downstream of exon 21. Mice containing the Shank3G mutation were crossed for 4 generations with C57BL6J. Het an…
SHANK3_10_KI_HM_InsG_Reinstate-Shank3	RESCUE-Genetic	Homozygous	Genetic reinstatement of wild type Shank3 as the Shank3G cassette containing knockin mice generated in the previous steps were crossed with CreESRT transgenic mice (B6.Cg-Tg(CAG-cre/Esr1)5Amc/J, activated by Tamoxifen administration to the mice, to excise the insertion reversing the mutation	Reinstatement of Shank3	SHANK3_10_KI_HM
SHANK3_10_KI_HT_InsG	Genetic	Heterozygous	Autism-associated guanine nucleotide insertion mutation (Shank3G) present in exon 21 was inserted into the Shank 3 gene, with the construct containing the mutation within exon21 sequence knocked into intron 20 .The additional G results in a frameshift mutation and a premature stop codon downstream of exon 21. Mice containing the Shank3G mutation were crossed for 4 generations with C57BL6J. Het an…
SHANK3_13_KO_HM	Genetic	Homozygous	Targeted Cre-LoxP mediated excision of exons 4-9 of Shank3 gene containing the ankyrin repeats. After germline transmission in C57BL6J, knock in mice were mated with mice expressing Flp1 recombinase to excise the Neo cassette used for positive selection. The resulting conditional Shank3 mice were crossed with mice expressing ZP3-Cre to excise exon4-9 in oocytes of female pups, then further crosse…
SHANK3_13_KO_HT	Genetic	Heterozygous	Targeted Cre-LoxP mediated excision of exons 4-9 of Shank3 gene containing the ankyrin repeats. After germline transmission in C57BL6J, knock in mice were mated with mice expressing Flp1 recombinase to excise the Neo cassette used for positive selection. The resulting conditional Shank3 mice were crossed with mice expressing ZP3-Cre to excise exon4-9 in oocytes of female pups, then further crosse…
SHANK3_15_KI_HM_InsG	Genetic	Homozygous	Autism-associated guanine nucleotide insertion mutation (Shank3InsG) was placed at position 3680 in exon 21, this insertion causes a frameshift and a stop codon immediately after the G insertion. The mice were maintained in C57B6/S129Sv background. Mice were bred to homozygosity normally
SHANK3_15_KI_HT_InsG	Genetic	Heterozygous	Autism-associated guanine nucleotide insertion mutation (Shank3InsG) was placed at position 3680 in exon 21, this insertion causes a frameshift and a stop codon immediately after the G insertion. The mice were maintained in C57B6/S129Sv background. Mice were bred to homozygosity
SHANK3_17_KI_HM_R1117X	Genetic	Homozygous	Schizophrenia associated non-sense mutation changing arginine to a stop codon (R1117X) was introduced by changing the codon for R 'CGG' to stop codon TGA in position 1117. Mice were maintained in C57Bl6*129Sv background and bred to homozygosity
SHANK3_17_KI_HT_R1117X	Genetic	Heterozygous	Schizophrenia associated non-sense mutation changing arginine to a stop codon (R1117X) was introduced by changing the codon for R 'CGG' to stop codon TGA in position 1117. Mice were maintained in C57Bl6*129Sv background
SHANK3_19_KO_HM	Genetic	Homozygous	Disruption of all murine Shank3 isoforms by cre/loxP mediated excision of exons 4-22 of the Shank3 gene, spanning 58 kb to include the coding sequences for all known Shank3 isoforms. The floxed mice were bred with CMV-cre mice to generate mice with deletions and bred till homozygosity. Authors report loss of all known Shank3 mRNA and protein
SHANK3_19_KO_HM_CDPPB-1	RESCUE-Pharmaceutical	Homozygous	CDPPB ( SML0235, Sigma-Aldrich), dissolved in 0.5% methylcellulose, was administered at a dose of 10 mg/kg (i.p.) 30 min before behavioral testing in Shank3 exon 4-22 deleted homozygous mice (2 months age)	CDPB	SHANK3_19_KO_HM
SHANK3_19_KO_HM_CDPPB-2	RESCUE-Pharmaceutical	Homozygous	CDPPB ( SML0235, Sigma-Aldrich), dissolved in 0.5% methylcellulose, was administered at a dose of 10 mg/kg (i.p.) for 7 days 30 min before behavioral testing,where mice were trained in a task every day, in Shank3 exon 4-22 deleted homozygous mice (2 months age)	CDPB	SHANK3_19_KO_HM
SHANK3_19_KO_HM_MPEP	RESCUE-Pharmaceutical	Homozygous	MPEP (M5343, Sigma-Aldrich), dissolved in 0.9% normal saline, was administered at a dose of 20mg/kg (i.p.) 30 min before behavioral testing in Shank3 exon 4-22 deleted homozygous mice (2 months of age). MPEP is a known mGlur5 antagonist	MPEP	SHANK3_19_KO_HM
SHANK3_19_KO_HT	Genetic	Heterozygous	Shank3 exon 4-22 floxed mice were bred to CMV-cre mice to generate heterozygous Shank3 knockouts
SHANK3_20_CKO_HM_NAc	Genetic	Homozygous	10-12 week old exon 4-22 floxed, female mice were injected with AAV10- Cre virus bilaterally in the nucleus accumbens (NAc) to selectively knockdown Shank3 in the NAc. Four weeks after the injection electrodes were surgically implanted in the NAc
SHANK3_21_KI_HM	Genetic	Homozygous	Targeted knockin inversion of exons 13 to 16, that include the coding region of the PDZ domain, generated using the FLEx genetic switch strategy. The inverted insert is flanked by FRT and loxP sites. The knockin floxed mouse is called a functional knockout by authors
SHANK3_22_KI_HM	Genetic	Homozygous	Mice with inverted exons 13-16 and the transgene CAGGS-CreER used as controls or parent models. Genotype of these mice is: Shank3fx/fx;CreER+/-.Mice received corn oil treatment (vehicle) at 2-4.5 months.
SHANK3_22_KI_HM_Reinstate-Adult	RESCUE-Genetic	Homozygous	Mice with the inverted exons 13-16 re-inverted using tamoxifen-inducible globally expressed CAGGS-CreER. The pCAGGS promoter includes the CMV early enhancer with chicken beta-actin promoter. Adult rescue was performed by tamoxifen treament by oral gavaging at 2-4.5 months while control group received corn oil. Genotype of mice: Shank3fx/fx;CreER+/-.	Reinstatement of Shank3	SHANK3_22_KI_HM
SHANK3_22_KI_HM_Reinstate-Juvenile	RESCUE-Genetic	Homozygous	Mice with the inverted exons 13-16 re-inverted using tamoxifen-inducible globally expressed CAGGS-CreER. The pCAGGS promoter includes the CMV early enhancer with chicken beta-actin promoter. Juvenile rescue was performed by tamoxifen treament by oral gavaging at P20 to 21, while control group received corn oil. Genotype of mice: Shank3fx/fx;CreER+/-.	Reinstatement of Shank3	SHANK3_22_KI_HM
SHANK3_3_KO_HT	Genetic	Heterozygous	Deletion of exon 21 of Shank3 resulting in lack of entire C-termain portion of Shank3 (the article reporting this model was retracted, however phenotypic data for the model has been retained following the retraction notification and MGI)
SHANK3_4_KO_HM	Genetic	Homozygous	Targeted deletion of exon 13 to 16 of Shank3 containing the PDZ domain, the positive selection marker neo cassette is retained
SHANK3_4_KO_HT	Genetic	Homozygous	Targeted deletion of exon 13 to 16 of Shank3 containing the PDZ domain, the positive selection marker neo cassette is retained
SHANK3_5_KO_HM	Genetic	Homozygous	Targeted deletion of exons 4 - 7 containing the ankyrin repeat domains of Shank3 gene, the positive selection marker neo cassette is retained
SHANK3_6_KO_HM	Genetic	Homozygous	Targeted deletion of exons 4-9 of Shank3 gene which includes the ankyrin repeat domains
SHANK3_7_KO_HM	Genetic	Homozygous	Targeted deletion of exon 11 within the SH3 domain of Shank3 gene
SHANK3_8_KO_HM	Genetic	Homozygous	Targeted deletion of exon 21 of the Shank3 gene using cre/loxP and frt flanked neo cassette. After removal of the neo cassette, mice containing the floxed gene were mated to actin-Cre mice for deleting the exon. Wild type Shank3 protein is not detected in these mice. Lower molecular weight isoforms of Shank3 are however detectable
SHANK3_8_KO_HM_TG003	RESCUE-Pharmaceutical	Homozygous	Shank3-exon 21 deleted mice were treated by IP injection with 30mg/kg TG003, CLK2 inhibitor. Parent model was previously described in PMID 2425956 and has lost the majority of the Shank3 C-terminus; major isoforms are reported to be absent but some smaller isoforms are detected	TG003, CLK2 inhibitor	Shank3_8_KO_HM
SHANK3_8_KO_HT	Genetic	Heterozygous	Targeted deletion of exon 21 (previously described in PMID 24259569); Deletion of exon 21 removes the majority of the Shank3 C-terminus; major isoforms absent but fast migrating truncated fragments present
SHANK3_8_KO_HT_HSV-CA-Rac1	RESCUE-Genetic	Heterozygous	Shank3-exon 21 deleted het mice were injected with a constitutively active form of Rac1 conjugated to the herpes simplex viral (HSV) genome, directly into the prefrontal cortex. ( the authors use GFP inserted into the HSV genome as the control injections)	constititutively active Rac1	SHANK3_8_KO_HT
SHANK3_8_KO_HT_TATcofilin-1	RESCUE-Pharmaceutical	Heterozygous	Shank3-exon 21 deleted het mice were given an injection of Tat-p-cofilin at a dose of 15 picomol/g (i.v.), this is a Tat conjugated 16 mer peptide with Ser3 - phosphorylated consisted of the first 16 residues of cofilin. It is an inhibitor of endogenous cofilin found in increased activated form in the mutant mice. Injections were given before behavioral testing in juvenile male mice.	p-cofilin peptide	SHANK3_8_KO_HT
SHANK3_8_KO_HT_TATcofilin-2	RESCUE-Pharmaceutical	Heterozygous	Shank3-exon 21 deleted het mice got bilateral stereotaxic injections of the cofilin inhibitory peptide (dose not specified in article but likely 15 picomol/g, same as i.v. injection) into the prefrontal cortex prior to social behavior testing	p-cofilin peptide	SHANK3_8_KO_HT
SHANK3_8_KO_HT_TATcofilin-3	RESCUE-Pharmaceutical	Heterozygous	Shank3-exon 21 del het mice were given an injection of Tat-p-cofilin at a low dose of 0.15 picomol/g (i.v.). This was done to examine the effects of lower dose of the Tat conjugated 16 mer Ser3 - phosphorylated cofilin peptide (inhibits endogenous cofilin). Injections were given before behavioral testing in juvenile male mice.	p-cofilin peptide	SHANK3_8_KO_HT
SHANK3_8_KO_HT_TG003	RESCUE-Pharmaceutical	Heterozygous	Shank3-exon 21 deleted het mice were treated by IP injection with 30mg/kg TG003, CLK2 inhibitor. Parent model was previously described in PMID 2425956 and has lost the majority of the Shank3 C-terminus; major isoforms are reported to be absent but some smaller isoforms are detected	TG003, CLK2 inhibitor	Shank3_8_KO_HT
SHANK3_23_KI_HT	Genetic	Heterozygous	Neo-STOP cassette was inserted in intron 12, between exon 12 and exon 13, of the Shank3 gene and results in the loss of two higher molecular weight isoforms of Shank3, and results in a protein lacking the PDZ domain
SHANK3_23_KI_HM	Genetic	Homozygous	KI of neo-STOP cassette inserted in intron 12, between exon 12 and exon 13, resulting in loss of higher mol weight Shank3 isoforms, bred to homozygosity. All Shank3 protein expressed in these mutants lacks the PDZ domain
